# Supplementary material for: KRE(CO3)2 (RE = Eu, Gd, Tb): new mixed metal carbonates with strong photoluminescence and large birefringence
Source: Royal Society of Chemistry journal article supplement (doi:10.1039/d2qi01533a), 2022-01-01
Supplement: d2qi01533a1.pdf [file d2qi01533a1.pdf]

## Electronic Supplementary Information (ESI)

### **KRE(CO<sub>3</sub>)<sub>2</sub> (RE = Eu, Gd, Tb): New Mixed Metal Carbonates with Strong Photoluminescence and Large Birefringence**

Yuan Lin, <sup>\*abc</sup> Chun-Li Hu, <sup>c</sup> Zhi Fang, <sup>c</sup> Jin Chen, <sup>d</sup> Wei-Jie Xie, <sup>c</sup> Yan Chen, <sup>ce</sup> Jian-Pu Wang <sup>ab</sup> and  
Jiang-Gao Mao<sup>\*c</sup>

- a. Strait Institute of Flexible Electronics (SIFE, Future Technologies), Fujian Normal University, Fuzhou 350117, Fujian, China.
- b. Strait Laboratory of Flexible Electronics (SLoFE), Fuzhou 350117, Fujian, China.
- c. State Key Laboratory of Structural Chemistry, Fujian Institute of Research on the Structure of Matter, Chinese Academy of Sciences, Fuzhou 350002, Fujian, China.
- d. Fujian Key Laboratory of Polymer Materials, College of Chemistry and Materials Science, Fujian Normal University, Fuzhou 350007, Fujian, China.
- e. School of Physical Science and Technology, Shanghai Tech University, Shanghai 201210, China.

E-mail: ifeylin@fjnu.edu.cn, mjg@fjirsm.ac.cn.

## Table of Contents

| Section    | Title                                                                                                                                                                                                                                                  | Page |
|------------|--------------------------------------------------------------------------------------------------------------------------------------------------------------------------------------------------------------------------------------------------------|------|
| Table S1   | Carbonates with experimental and calculated birefringence values reported.                                                                                                                                                                             | S1   |
| Table S2   | Crystallographic data for $\text{KRE}(\text{CO}_3)_2$ (RE = Eu, Gd, Tb).                                                                                                                                                                               | S2   |
| Table S3   | Important bond lengths (Å) for $\text{KEu}(\text{CO}_3)_2$ .                                                                                                                                                                                           | S3   |
| Table S4   | Important bond lengths (Å) for $\text{KGd}(\text{CO}_3)_2$ .                                                                                                                                                                                           | S3   |
| Table S5   | Important bond lengths (Å) for $\text{KTb}(\text{CO}_3)_2$ .                                                                                                                                                                                           | S3   |
| Figure S1  | Experimental and simulated powder X-ray diffraction patterns of $\text{KRE}(\text{CO}_3)_2$ (RE = Eu (a), Gd (b), Tb (c)).                                                                                                                             | S4   |
| Figure S2  | Structure of $\text{KGdCO}_3\text{F}_2$ .                                                                                                                                                                                                              | S4   |
| Figure S3  | TGA curves of $\text{KRE}(\text{CO}_3)_2$ (RE = Eu (a), Gd (b), Tb (c)).                                                                                                                                                                               | S5   |
| Figure S4  | IR spectra of $\text{KRE}(\text{CO}_3)_2$ (RE = Eu (a), Gd (b), Tb (c)).                                                                                                                                                                               | S5   |
| Figure S5  | The UV-visible-near IR diffuse reflectance spectra of $\text{KRE}(\text{CO}_3)_2$ (RE = Eu (a), Gd (b), Tb (c)).                                                                                                                                       | S6   |
| Figure S6  | The excitation spectrum of $\text{KEu}(\text{CO}_3)_2$ under emission at 616 nm.                                                                                                                                                                       | S6   |
| Figure S7  | The photoluminescence spectra (PL, red line) of $\text{KGd}(\text{CO}_3)_2$ at 275 nm excitation (a); absorption spectra (black line) and photoluminescence excitation spectra (PLE, blue line) at 312 nm emission of $\text{KGd}(\text{CO}_3)_2$ (b). | S6   |
| Figure S8  | The photoluminescence spectra (PL, red line) of $\text{KTb}(\text{CO}_3)_2$ at 282 nm excitation (a); absorption spectra (black line) and photoluminescence excitation spectra (PLE, blue line) at 543 nm emission of $\text{KTb}(\text{CO}_3)_2$ (b). | S7   |
| Figure S9  | Photographs of $\text{KEu}(\text{CO}_3)_2$ for the measurement of birefringence.                                                                                                                                                                       | S7   |
| Figure S10 | Photographs of $\text{KGd}(\text{CO}_3)_2$ for the measurement of birefringence.                                                                                                                                                                       | S8   |
| Figure S11 | The structure of $\text{CaCO}_3$ .                                                                                                                                                                                                                     | S8   |
| Figure S12 | The structure of $\text{CO}_3$ in $\text{CaCO}_3$ (a) and $\text{KTb}(\text{CO}_3)_2$ (b).                                                                                                                                                             | S9   |
| Figure S13 | The $\text{CaO}_6$ octahedron (a) in $\text{CaCO}_3$ , $\text{KO}_{10}$ polyhedron (b) and $\text{TbO}_8$ polyhedron (c) in $\text{KTb}(\text{CO}_3)_2$ .                                                                                              | S9   |
| References |                                                                                                                                                                                                                                                        | S10  |

Table S1. Carbonates with experimental and calculated birefringence values reported.

| Compound                                                                                                        | Space group              | Cut-off edge                | SHG efficiency (1064 nm)           | Birefringence                                                                                                  |
|-----------------------------------------------------------------------------------------------------------------|--------------------------|-----------------------------|------------------------------------|----------------------------------------------------------------------------------------------------------------|
| LiNaCO <sub>3</sub> <sup>1</sup>                                                                                | $P1/P\bar{6}/P\bar{6}m2$ | -                           | 1.3 × KDP                          | Experimental: 0.13                                                                                             |
| LiKCO <sub>3</sub> <sup>2</sup>                                                                                 | $P2_1/c$                 | 196                         | -                                  | Calculated: 0.11                                                                                               |
| LiRbCO <sub>3</sub> <sup>2</sup>                                                                                | $P2_1/n$                 | 197                         | -                                  | Calculated: 0.10                                                                                               |
| LiCsCO <sub>3</sub> <sup>2</sup>                                                                                | $P2_1/n$                 | 200                         | -                                  | Calculated: 0.09                                                                                               |
| KSrCO <sub>3</sub> F <sup>3-6</sup>                                                                             | $P\bar{6}m2$             | < 200                       | 3.33 × KDP                         | Experimental: 0.1117 (532 nm)<br>Calculated: 0.105 (1064 nm)                                                   |
| RbSrCO <sub>3</sub> F <sup>3, 4</sup>                                                                           | $P\bar{6}m2$             | < 200                       | 3.33 × KDP                         | Calculated: 0.102 (1064 nm)                                                                                    |
| KCaCO <sub>3</sub> F <sup>3, 4</sup>                                                                            | $P\bar{6}m2$             | < 200                       | 3.61 × KDP                         | Calculated: 0.112 (1064 nm)                                                                                    |
| RbCaCO <sub>3</sub> F <sup>3, 4, 7</sup>                                                                        | $P\bar{6}m2$             | < 200                       | 1.11 × KDP                         | Calculated: 0.116 (1064 nm)                                                                                    |
| CsCaCO <sub>3</sub> F <sup>3, 4</sup>                                                                           | $P\bar{6}m2$             | < 200                       | 1.11 × KDP                         | Calculated: 0.107 (1064 nm)                                                                                    |
| Cs <sub>3</sub> Ba <sub>4</sub> (CO <sub>3</sub> ) <sub>3</sub> F <sup>5, 3, 4</sup>                            | $P6_3mc$                 | 210                         | 1.20 × KDP                         | Calculated: 0.034 (1064 nm)                                                                                    |
| Ca <sub>2</sub> Na <sub>3</sub> (CO <sub>3</sub> ) <sub>3</sub> F <sup>8</sup>                                  | $Cm$                     | 190                         | 3.00 × KDP                         | Experimental: 0.082 (532 nm)<br>Calculated: 0.072 (532 nm)                                                     |
| Y <sub>8</sub> O(OH) <sub>15</sub> (CO <sub>3</sub> ) <sub>3</sub> Cl <sup>9</sup>                              | $P6_3$                   | 234                         | 2.5 × KDP                          | Experimental: 0.092 (1064nm)<br>Calculated: 0.072 (1064 nm)                                                    |
| RE <sub>8</sub> O(CO <sub>3</sub> ) <sub>3</sub> (OH) <sub>15</sub> X<br>(RE = Y, Lu; X = Cl, Br) <sup>10</sup> | $P6_3$                   | 266,<br>266,<br>254,<br>283 | 1.65/ 2.22/<br>1.83/ 3.00 ×<br>KDP | Experimental: 0.045/ 0.062/<br>0.073/ 0.088 (546.1 nm)<br>Calculated: 0.037/ 0.044/<br>0.058/ 0.070 (546.1 nm) |
| NaPb <sub>2</sub> (CO <sub>3</sub> ) <sub>2</sub> F <sup>11</sup>                                               | $P6_3/mmc$               | 289                         | -                                  | Calculated: 0.269 (1064 nm)                                                                                    |
| KPb <sub>2</sub> (CO <sub>3</sub> ) <sub>2</sub> F <sup>7, 12</sup>                                             | $P6_3/mmc$               | 318                         | -                                  | Calculated: 0.27 (1064 nm)                                                                                     |
| CsPbCO <sub>3</sub> F <sup>5, 7, 13, 14</sup>                                                                   | $P\bar{6}m2$             | 299                         | 13.4 × KDP                         | Calculated: 0.17 (1064 nm)                                                                                     |
| RbMgCO <sub>3</sub> F <sup>7, 15</sup>                                                                          | $P\bar{6}2m$             | < 190                       | 160 × α-SiO <sub>2</sub>           | Calculated: 0.13 (1064 nm)                                                                                     |
| RbCdCO <sub>3</sub> F <sup>7, 16</sup>                                                                          | $P\bar{6}c2$             | 233                         | 2.8 × KDP                          | Calculated: 0.12 (1064 nm)                                                                                     |
| Cs <sub>3</sub> Pb <sub>2</sub> (CO <sub>3</sub> ) <sub>3</sub> I <sup>17</sup>                                 | $C2/m$                   | 300                         | -                                  | Calculated: 0.14 (546 nm)                                                                                      |
| KY(CO <sub>3</sub> ) <sub>2</sub> <sup>18</sup>                                                                 | $C2/c$                   | < 200                       | -                                  | Calculated: 0.105 (1064 nm)                                                                                    |
| Na <sub>2</sub> Gd(CO <sub>3</sub> ) <sub>3</sub> F <sup>18</sup>                                               | $Pbca$                   | < 200                       | -                                  | Calculated: 0.084 (1064 nm)                                                                                    |
| NaGd <sub>0.25</sub> Lu <sub>0.75</sub> (CO <sub>3</sub> ) <sub>3</sub> F <sub>2</sub> <sup>18</sup>            | $Pnma$                   | < 200                       | -                                  | Calculated: 0.198 (1064 nm)                                                                                    |
| NaY(CO <sub>3</sub> ) <sub>2</sub> <sup>19</sup>                                                                | $P2_1/c$                 | < 200                       | -                                  | Calculated: 0.088 (1064 nm)                                                                                    |
| YOHCO <sub>3</sub> <sup>19</sup>                                                                                | $P2_12_12_1$             | < 200                       | 2 × KDP                            | Calculated: 0.077 (1064 nm)                                                                                    |
| NaZnCO <sub>3</sub> F <sup>20</sup>                                                                             | $P\bar{6}2c$             | 269                         | 2.75 × KDP                         | Calculated: 0.171 (1064 nm)                                                                                    |
| Na <sub>4</sub> Zn(CO <sub>3</sub> ) <sub>3</sub> <sup>20</sup>                                                 | $P2_1/c$                 | 305                         | -                                  | Calculated: 0.138 (1064 nm)                                                                                    |
| NaZnCO <sub>3</sub> (OH) <sup>21</sup>                                                                          | $Pc$                     | 200                         | 5.2 × KDP                          | Calculated: 0.114 (1064 nm)                                                                                    |
| Zn(NH <sub>3</sub> )CO <sub>3</sub> <sup>22</sup>                                                               | $Pna2_1$                 | 204                         | 1.5 × KDP                          | Experimental: 0.087 (546 nm)<br>Calculated: 0.085(1064 nm)                                                     |
| LiZn(OH)CO <sub>3</sub> <sup>23</sup>                                                                           | $Pmn2_1$                 | < 190                       | 3.2 × KDP                          | Calculated: 0.147(1064 nm)                                                                                     |
| Na <sub>3</sub> Zn <sub>2</sub> (CO <sub>3</sub> ) <sub>3</sub> F <sup>24</sup>                                 | $C2/c$                   | 213                         | -                                  | Calculated: 0.11(589 nm)                                                                                       |
| Sr <sub>3</sub> [SnOSe <sub>3</sub> ][CO <sub>3</sub> ] <sup>25</sup>                                           | $Pmn2_1$                 | 314                         | 1 × AGS                            | Calculated: 0.12(1064 nm)                                                                                      |
| Na <sub>2</sub> CO <sub>3</sub> <sup>26</sup>                                                                   | $C2/m$                   | 221                         | -                                  | Calculated: 0.144(1064 nm)                                                                                     |
| K <sub>2</sub> CO <sub>3</sub> <sup>26</sup>                                                                    | $P2_1/c$                 | 225                         | -                                  | Calculated: 0.113(1064 nm)                                                                                     |

|                                                                  |                               |       |   |                            |
|------------------------------------------------------------------|-------------------------------|-------|---|----------------------------|
| Rb <sub>2</sub> CO <sub>3</sub> <sup>26</sup>                    | <i>P2<sub>1</sub>/c</i>       | 237   | - | Calculated: 0.107(1064 nm) |
| Cs <sub>2</sub> CO <sub>3</sub> <sup>26</sup>                    | <i>P2<sub>1</sub>/c</i>       | 328   | - | Calculated: 0.082(1064 nm) |
| K <sub>3</sub> CO <sub>3</sub> F <sup>26</sup>                   | <i>R<math>\bar{3}</math>c</i> | 221   | - | Calculated: 0.085(1064 nm) |
| NaHCO <sub>3</sub> <sup>26</sup>                                 | <i>P2<sub>1</sub>/c</i>       | < 190 | - | Calculated: 0.202(1064 nm) |
| KHCO <sub>3</sub> <sup>26</sup>                                  | <i>P2<sub>1</sub>/a</i>       | < 190 | - | Calculated: 0.172(1064 nm) |
| RbHCO <sub>3</sub> <sup>26</sup>                                 | <i>C<math>\bar{1}</math></i>  | < 190 | - | Calculated: 0.164(1064 nm) |
| CsHCO <sub>3</sub> <sup>26</sup>                                 | <i>P2<sub>1</sub>/n</i>       | < 190 | - | Calculated: 0.131(1064 nm) |
| K <sub>2</sub> HCO <sub>3</sub> F·H <sub>2</sub> O <sup>26</sup> | <i>P2<sub>1</sub>/m</i>       | < 190 | - | Calculated: 0.095(1064 nm) |
| KLi <sub>2</sub> CO <sub>3</sub> F <sup>27</sup>                 | <i>P6<sub>3</sub>22</i>       | < 190 | - | Calculated: 0.124 (546 nm) |

Table S2. Crystallographic data for KRE(CO<sub>3</sub>)<sub>2</sub> (RE = Eu, Gd, Tb).

| Compound                                       | KEu(CO <sub>3</sub> ) <sub>2</sub> | KGd(CO <sub>3</sub> ) <sub>2</sub> | KTb(CO <sub>3</sub> ) <sub>2</sub> |
|------------------------------------------------|------------------------------------|------------------------------------|------------------------------------|
| Fw                                             | 311.08                             | 316.37                             | 318.04                             |
| <i>T</i> (K)                                   | 293(2)                             | 293(2)                             | 293(2)                             |
| crystal system                                 | monoclinic                         | monoclinic                         | monoclinic                         |
| space group                                    | <i>C2/c</i>                        | <i>C2/c</i>                        | <i>C2/c</i>                        |
| <i>a</i> (Å)                                   | 8.5882(3)                          | 8.5701(12)                         | 8.5419(7)                          |
| <i>b</i> (Å)                                   | 9.6029(3)                          | 9.5705(10)                         | 9.5290(6)                          |
| <i>c</i> (Å)                                   | 6.9976(2)                          | 6.9821(10)                         | 6.9503(5)                          |
| $\beta$ (deg)                                  | 111.297(4)                         | 111.291(16)                        | 111.004(9)                         |
| <i>V</i> (Å <sup>3</sup> )                     | 537.69(3)                          | 533.59(13)                         | 528.14(7)                          |
| <i>Z</i>                                       | 2                                  | 2                                  | 2                                  |
| $\rho_{\text{calcd}}$ (g·cm <sup>-3</sup> )    | 3.843                              | 3.938                              | 4.000                              |
| $\mu$ (mm <sup>-1</sup> )                      | 12.400                             | 13.170                             | 14.139                             |
| <i>R</i> <sub>int</sub>                        | 0.0477                             | 0.0296                             | 0.1104                             |
| GOF on F <sup>2</sup>                          | 1.128                              | 1.117                              | 1.079                              |
| <i>R</i> <sub>1</sub> , <i>wR</i> <sub>2</sub> | 0.0156, 0.0406                     | 0.0173, 0.0406                     | 0.0243, 0.0481                     |
| ( <i>I</i> > 2σ( <i>I</i> )) <sup>a</sup>      |                                    |                                    |                                    |
| <i>R</i> <sub>1</sub> , <i>wR</i> <sub>2</sub> | 0.0159, 0.0407                     | 0.0178, 0.0408                     | 0.0271, 0.0492                     |
| (all data)                                     |                                    |                                    |                                    |

$$^a R_1 = \sum ||F_o| - |F_c|| / \sum |F_o|; wR_2 = \{ \sum w[(F_o)^2 - (F_c)^2]^2 / \sum w[(F_o)^2]^2 \}^{1/2}.$$

Table S3. Important bond lengths (Å) for KEu(CO<sub>3</sub>)<sub>2</sub>.

|             |          |               |          |
|-------------|----------|---------------|----------|
| K(1)-O(1)#1 | 2.793(3) | Eu(1)-O(1)    | 2.429(3) |
| K(1)-O(1)#2 | 2.820(3) | Eu(1)-O(1)#6  | 2.429(3) |
| K(1)-O(1)#3 | 2.793(3) | Eu(1)-O(2)#7  | 2.358(3) |
| K(1)-O(1)   | 2.820(3) | Eu(1)-O(2)    | 2.532(3) |
| K(1)-O(2)#4 | 2.885(3) | Eu(1)-O(2)#6  | 2.532(3) |
| K(1)-O(2)#5 | 2.885(3) | Eu(1)-O(2) #8 | 2.358(3) |
| K(1)-O(3)#5 | 3.123(4) | Eu(1)-O(3) #9 | 2.313(3) |
| K(1)-O(3)#4 | 3.123(4) | Eu(1)-O(3)#4  | 2.313(3) |
| K(1)-O(3)#3 | 3.219(3) | C(1)-O(1)     | 1.287(5) |
| K(1)-O(3)#1 | 3.219(3) | C(1)-O(2)     | 1.311(5) |
|             |          | C(1)-O(3)     | 1.249(5) |

Symmetry transformations used to generate equivalent atoms:

 $^1+x,1-y,1/2+z; ^2-x,+y,1/2-z; ^3-x,1-y,-z; ^41/2-x,-1/2+y,1/2-z; ^5-1/2+x,-1/2+y,+z; ^61-x,+y,1/2-z; ^71-x,1-y,1-z; ^8+x,1-y,-1/2+z; ^91/2+x,-1/2+y,+z;$ 
Table S4. Important bond lengths (Å) for KGd(CO<sub>3</sub>)<sub>2</sub>.

|              |          |               |          |
|--------------|----------|---------------|----------|
| K(1)-O(1) #1 | 2.791(3) | Gd(1)-O(1)#6  | 2.416(3) |
| K(1)-O(1)#2  | 2.816(3) | Gd(1)-O(1)    | 2.416(3) |
| K(1)-O(1)#3  | 2.791(3) | Gd(1)-O(2)#7  | 2.348(3) |
| K(1)-O(1)    | 2.816(3) | Gd(1)-O(2)    | 2.523(3) |
| K(1)-O(2)#4  | 2.878(3) | Gd(1)-O(2) #6 | 2.523(3) |
| K(1)-O(2)#5  | 2.878(3) | Gd(1)-O(2)#8  | 2.348(3) |
| K(1)-O(3)#5  | 3.123(4) | Gd(1)-O(3)#9  | 2.301(3) |
| K(1)-O(3)#4  | 3.123(4) | Gd(1)-O(3)#4  | 2.301(3) |
| K(1)-O(3)#3  | 3.212(3) | C(1)-O(1)     | 1.274(6) |
| K(1)-O(3)#1  | 3.212(3) | C(1)-O(2)     | 1.315(6) |
|              |          | C(1)-O(3)     | 1.256(6) |

Symmetry transformations used to generate equivalent atoms:

 $^1+x,1-y,1/2+z; ^2-x,+y,1/2-z; ^3-x,1-y,-z; ^41/2-x,-1/2+y,1/2-z; ^5-1/2+x,-1/2+y,+z; ^61-x,+y,1/2-z; ^71-x,1-y,1-z; ^8+x,1-y,-1/2+z; ^91/2+x,-1/2+y,+z;$ 
Table S5. Important bond lengths (Å) for KTb(CO<sub>3</sub>)<sub>2</sub>.

|              |          |               |          |
|--------------|----------|---------------|----------|
| K(1)-O(1) #1 | 2.872(3) | Tb(1)-O(1)#4  | 2.513(3) |
| K(1)-O(1)#2  | 2.872(3) | Tb(1)-O(1)    | 2.335(3) |
| K(1)-O(2)#3  | 2.802(3) | Tb(1)-O(1)#8  | 2.513(3) |
| K(1)-O(2)#4  | 2.790(3) | Tb(1)-O(1)#7  | 2.335(3) |
| K(1)-O(2)    | 2.802(3) | Tb(1)-O(2) #7 | 2.404(3) |
| K(1)-O(2)#5  | 2.790(3) | Tb(1)-O(2)    | 2.404(3) |
| K(1)-O(3)#6  | 3.115(4) | Tb(1)-O(3)    | 2.288(3) |
| K(1)-O(3)#7  | 3.115(4) | Tb(1)-O(3) #7 | 2.288(3) |
| K(1)-O(3) #2 | 3.223(3) | C(1)-O(1)# 8  | 1.307(5) |
| K(1)-O(3) #1 | 3.223(3) | C(1)-O(2)# 7  | 1.268(5) |
|              |          | C(1)-O(3)#9   | 1.262(5) |

Symmetry transformations used to generate equivalent atoms:

$^1-1/2+x, 1/2-y, 1/2+z$ ;  $^2-1/2-x, 1/2-y, -z$ ;  $^3-1-x, +y, 1/2-z$ ;  $^4+x, 1-y, 1/2+z$ ;  $^5-1-x, 1-y, -z$ ;  $^6-1+x, +y, +z$ ;  $^7-x, +y, 1/2-z$ ;  $^8-x, 1-y, -z$ ;  $^91/2-x, 1/2+y, 1/2-z$

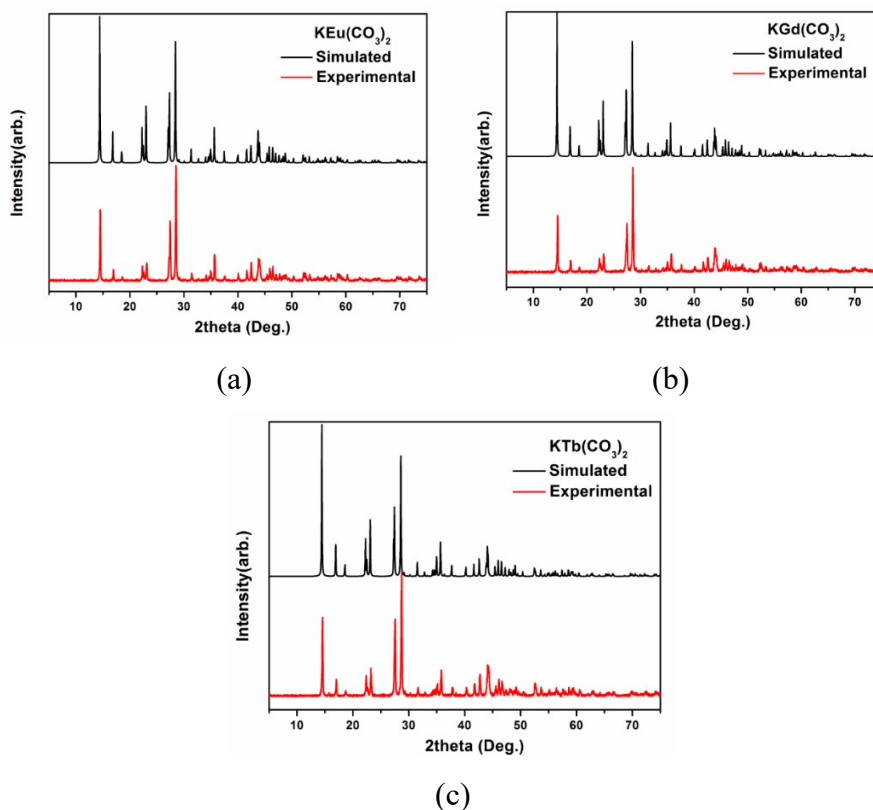

Figure S1. Experimental and simulated powder X-ray diffraction patterns of  $\text{KRE}(\text{CO}_3)_2$  (RE = Eu (a), Gd (b), Tb (c)).

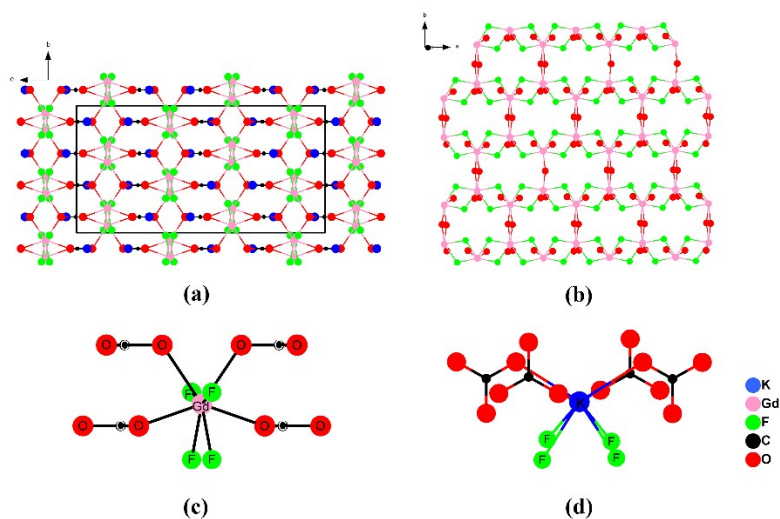

Figure S2. Structure of  $\text{KGdCO}_3\text{F}_2$ : View of the three-dimensional structure of  $\text{KGdCO}_3\text{F}_2$  down the  $a$  axis (a), the two-dimensional  $[\text{GdO}_4\text{F}_4]^{9-}$  layer within the  $ab$  plane (b), coordination environment around the  $\text{Gd1}$  atom (c) and  $\text{K1}$  atom (d).

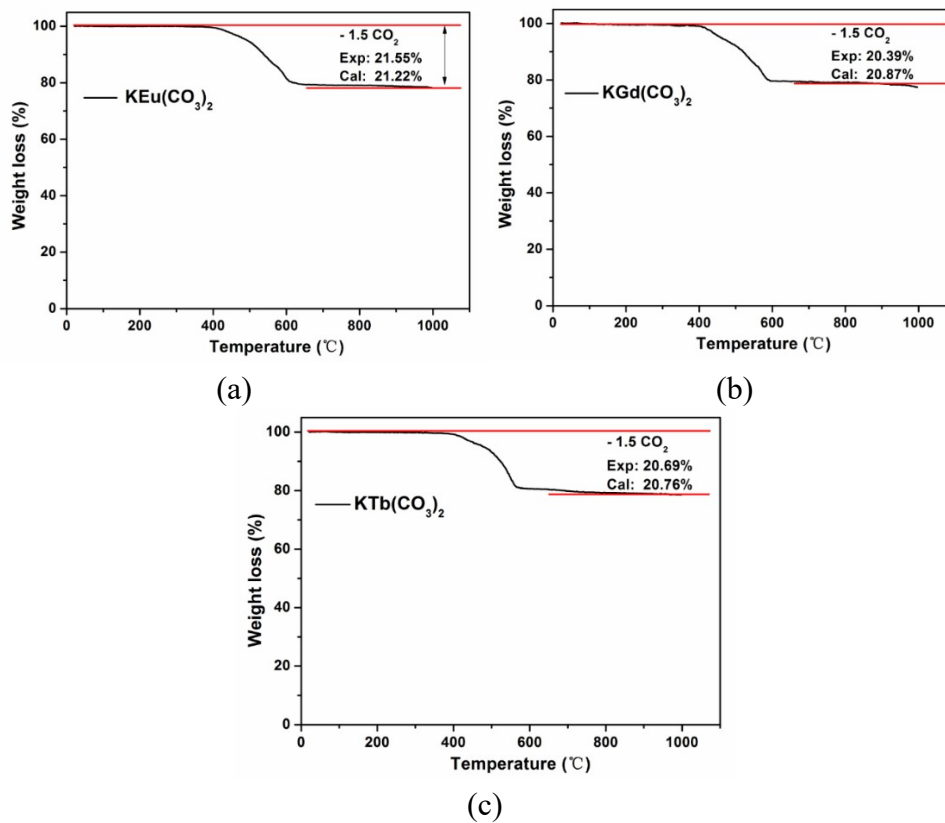

Figure S3. TGA curves of KRE(CO<sub>3</sub>)<sub>2</sub> (RE = Eu (a), Gd (b), Tb (c)).

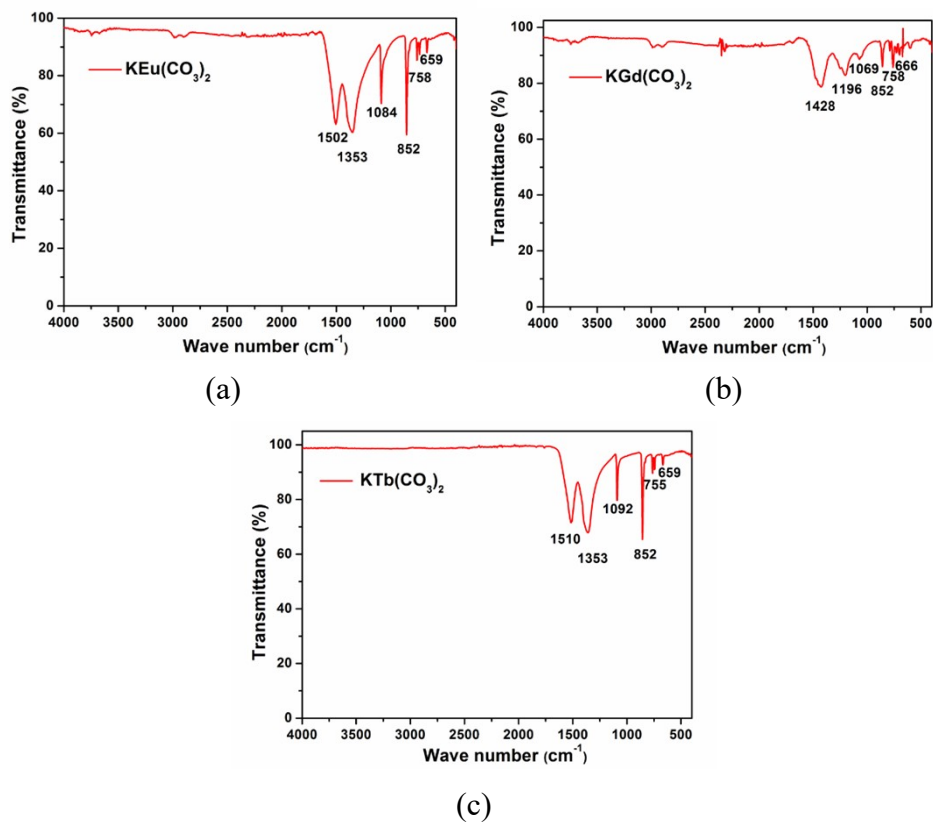

Figure S4. IR spectra of KRE(CO<sub>3</sub>)<sub>2</sub> (RE = Eu (a), Gd (b), Tb (c)).

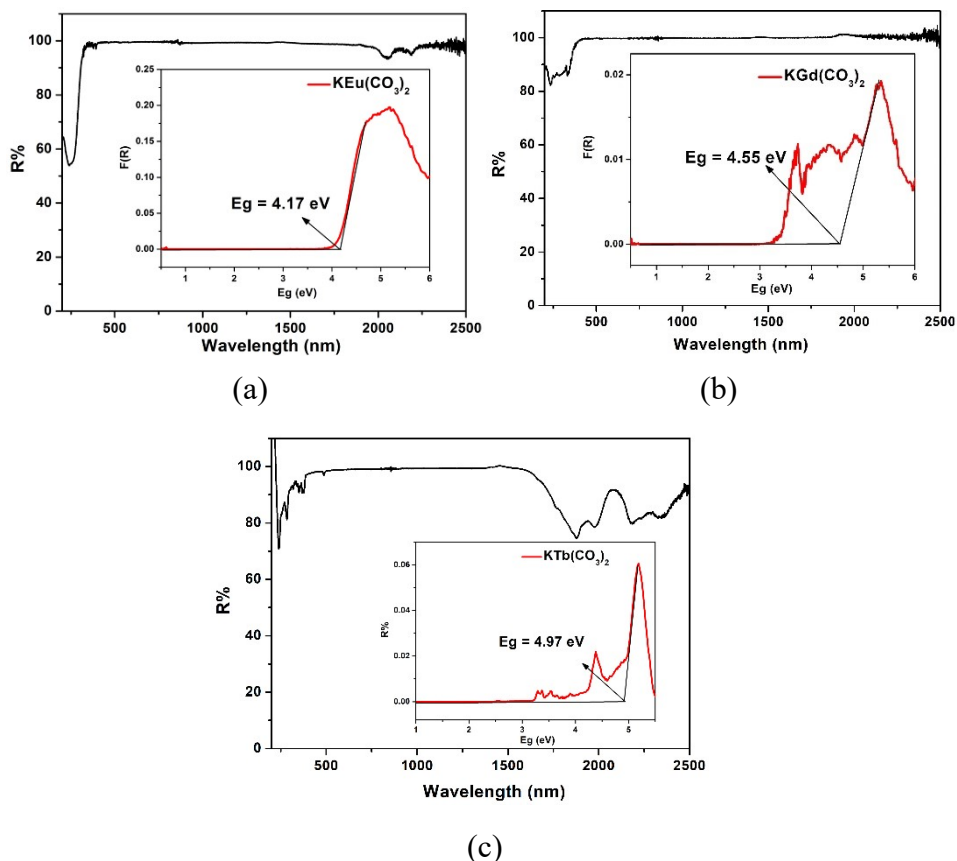

Figure S5. The UV-visible-near IR diffuse reflectance spectra of  $\text{KRE}(\text{CO}_3)_2$  (RE = Eu (a), Gd (b), Tb (c)).

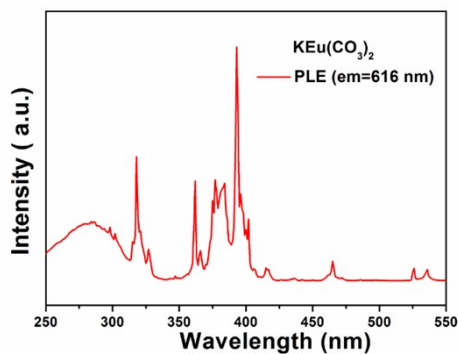

Figure S6. The excitation spectrum of  $\text{KEu}(\text{CO}_3)_2$  under emission at 616 nm.

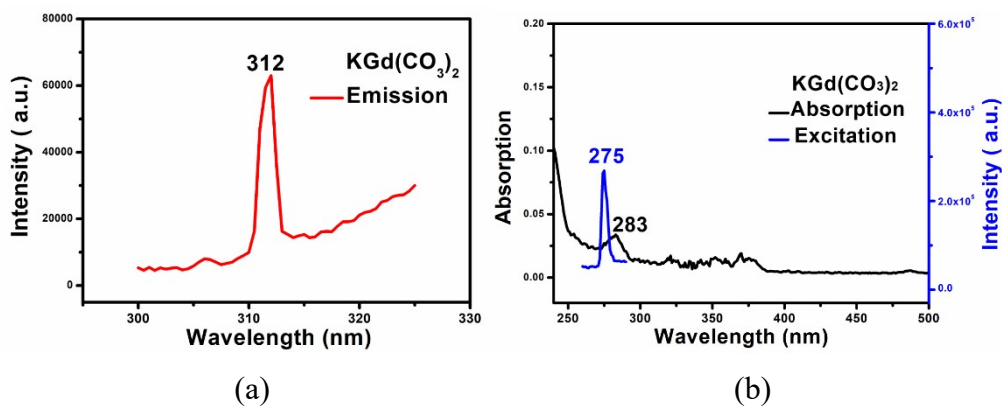

Figure S7. The photoluminescence spectra (PL, red line) of  $\text{KGd}(\text{CO}_3)_2$  at 275 nm excitation (a);



absorption spectra (black line) and photoluminescence excitation spectra (PLE, blue line) at 312 nm emission of  $\text{KGd}(\text{CO}_3)_2$  (b).

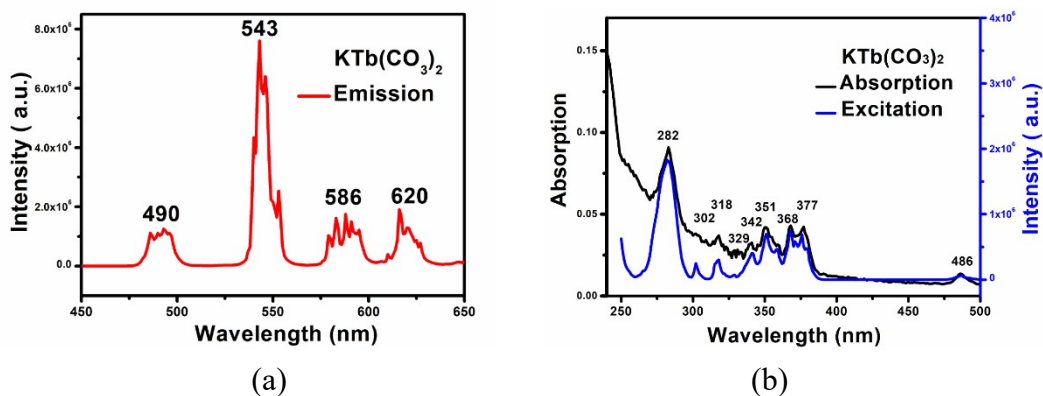

Figure S8. The photoluminescence spectra (PL, red line) of  $\text{KTb}(\text{CO}_3)_2$  at 282 nm excitation (a); absorption spectra (black line) and photoluminescence excitation spectra (PLE, blue line) at 543 nm emission of  $\text{KTb}(\text{CO}_3)_2$  (b).

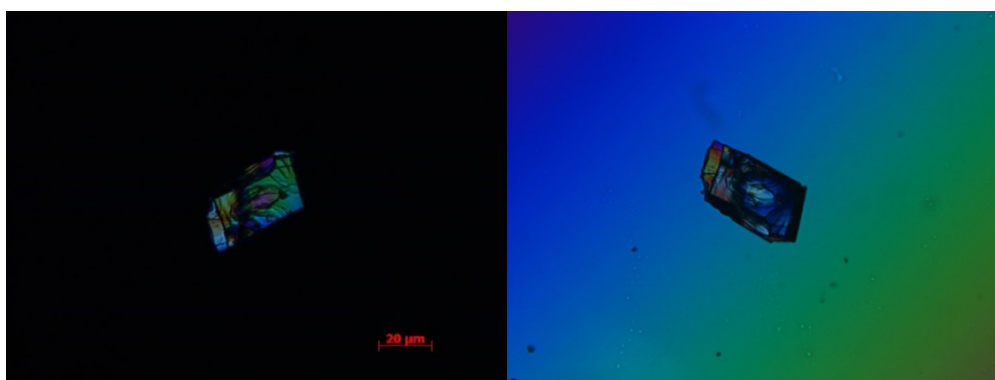

(a) (b)

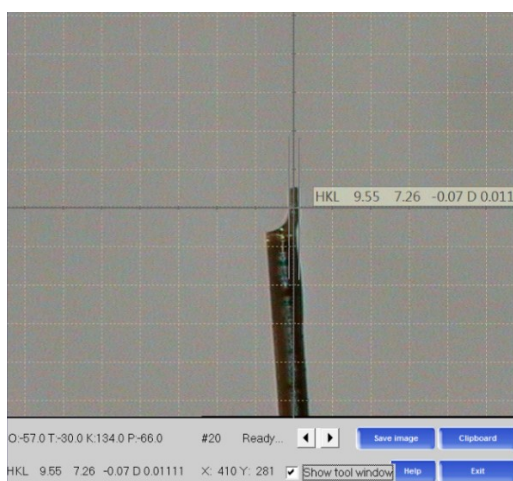

(c)

Figure S9. Photographs of  $\text{KEu}(\text{CO}_3)_2$  for the measurement of birefringence: the original crystal (a), the complete extinction crystal (b) and the thickness of the crystal (c).

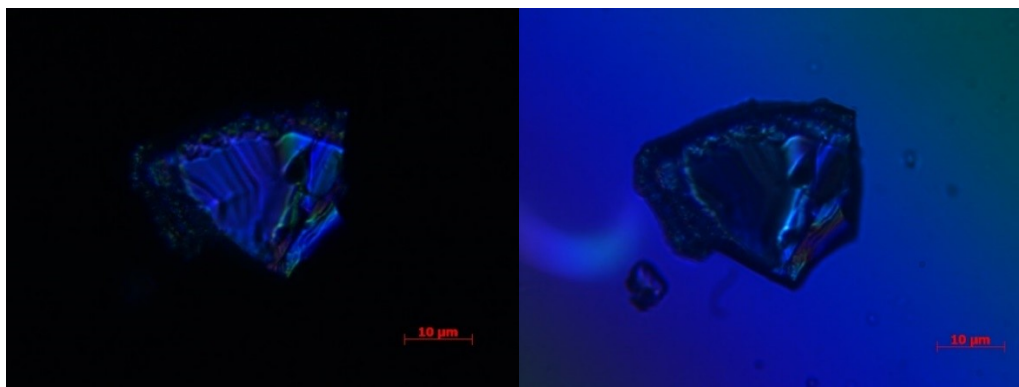

(a)

(b)

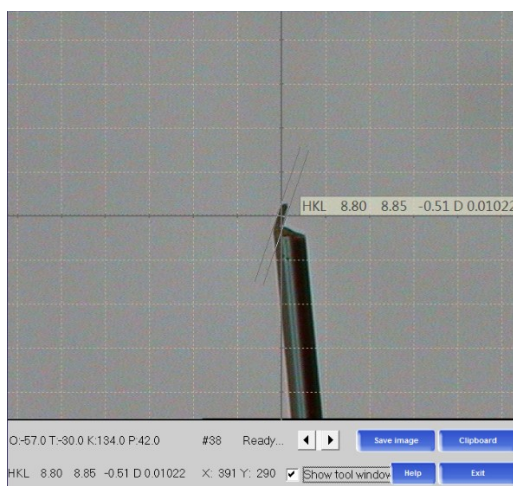

(c)

Figure S10. Photographs of  $\text{KGd}(\text{CO}_3)_2$  for the measurement of birefringence: the original crystal (a), the complete extinction crystal (b) and the thickness of the crystal (c).

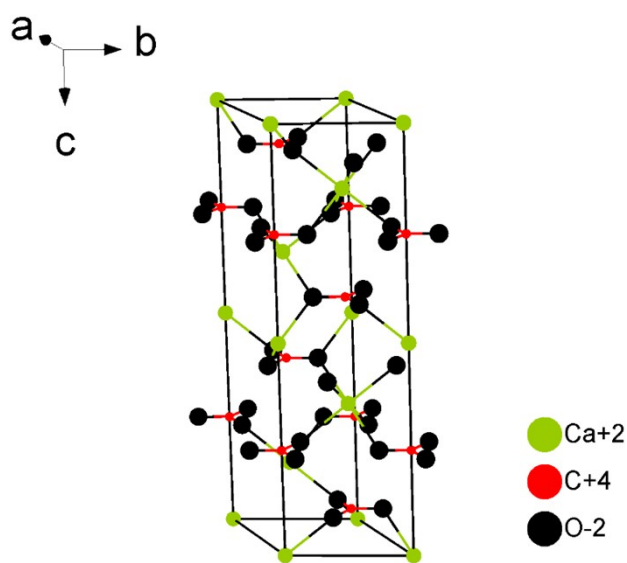

Figure S11. The structure of  $\text{CaCO}_3$ .

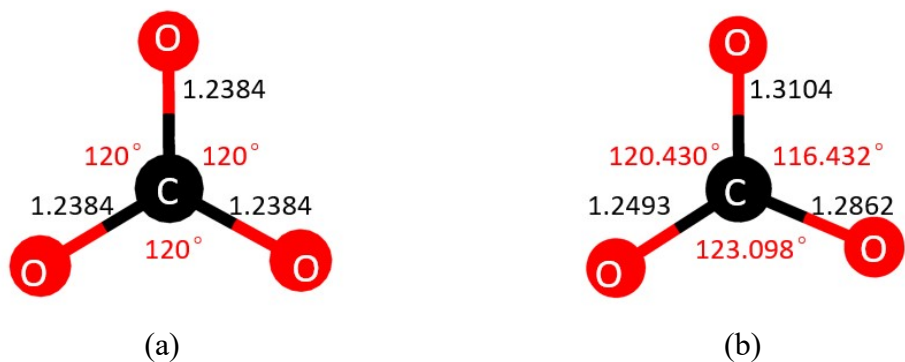

Figure S12. The structure of  $\text{CO}_3$  in  $\text{CaCO}_3$  (a) and  $\text{KTb}(\text{CO}_3)_2$  (b).

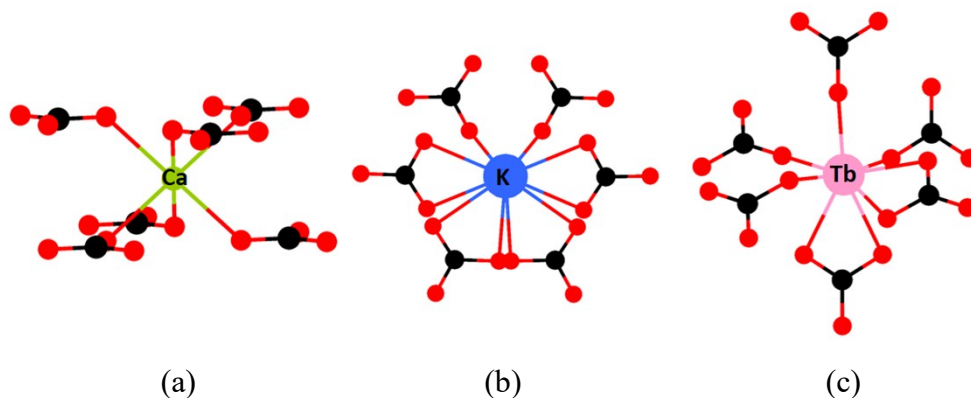

Figure S13. The  $\text{CaO}_6$  octahedron (a) in  $\text{CaCO}_3$ ,  $\text{KO}_{10}$  polyhedron (b) and  $\text{TbO}_8$  polyhedron (c) in  $\text{KTb}(\text{CO}_3)_2$ .

## References

- 1 V. A. Dyakov, C. A. Ebberts, M. V. Pchelkin and V. I. Pryalkin, Lithium sodium carbonate: a new nonlinear-optics crystal, *J. Russ. Laser. Res.*, 1996, **17**, 489-494.
- 2 Q. Liu, Z. Li, Y. Wang, X. Su, Z. H. Yang and S. L. Pan,  $\text{LiMCO}_3$  (M = K, Rb, Cs): a series of mixed alkali carbonates with large birefringence, *Dalton Trans.*, 2017, **46**, 6894-6899.
- 3 L. Kang, S. Y. Luo, H. W. Huang, N. Ye, Z. S. Lin, J. G. Qin and C. T. Chen, Prospects for fluoride carbonate nonlinear optical crystals in the UV and deep-UV regions, *J. Phys. Chem. B*, 2013, **117**, 25684-25692.
- 4 G. H. Zou, N. Ye, L. Huang and X. S. Lin, Alkaline-alkaline earth fluoride carbonate crystals  $\text{ABCO}_3\text{F}$  (A = K, Rb, Cs; B = Ca, Sr, Ba) as nonlinear optical materials, *J. Am. Chem. Soc.*, 2011, **133**, 20001-20007.
- 5 C. S. Lin, A. Y. Zhou, W. D. Cheng, N. Ye and G. L. Chai, Atom-resolved analysis of birefringence of nonlinear optical crystals by bader charge integration, *J. Phys. Chem. B*, 2019, **123**, 31183-31189.
- 6 W. Zhang and P. S. Halasyamani, Crystal growth and optical properties of a UV nonlinear optical material  $\text{KSrCO}_3\text{F}$ , *Crystengcomm*, 2017, **19**, 4742-4748.
- 7 Q. Jing, G. Yang, J. Hou, M. Z. Sun and H. B. Cao, Positive and negative contribution to birefringence in a family of carbonates: A Born effective charges analysis, *J. Solid State Chem.*, 2016, **244**, 69-74.
- 8 M. Luo, Y. X. Song, C. S. Lin, N. Ye, W. D. Cheng and X. F. Long, Molecular engineering as an approach to design a new beryllium-free fluoride carbonate as a deep-ultraviolet nonlinear optical material, *Chem. Mater.*, 2016, **28**, 2301-2307.
- 9 Y. T. Zhang, Y. Long, X. H. Dong, L. Wang, L. Huang, H. M. Zeng, Z. Lin, X. Wang and G. H. Zou,  $\text{Y}_8\text{O}(\text{OH})_{15}(\text{CO}_3)_3\text{Cl}$ : an excellent short-wave UV nonlinear optical material exhibiting an infrequent three-dimensional inorganic cationic framework, *Chem. Commun.*, 2019, **55**, 4538-4541.
- 10 L. L. Cao, Y. X. Song, G. Peng, M. Luo, Y. Yang, C. S. Lin, D. Zhao, F. Xu, Z. S. Lin and N. Ye, Refractive index modulates second-harmonic responses in  $\text{RE}_8\text{O}(\text{CO}_3)_3(\text{OH})_{15}\text{X}$  (RE = Y, Lu; X = Cl, Br): rare-earth halide carbonates as ultraviolet nonlinear optical materials, *Chem. Mater.*, 2019, **31**, 2130-2137.
- 11 K. C. Chen, G. Peng, C. S. Lin, M. Luo, H. X. Fan, S. D. Yang and N. Ye,  $\text{NaPb}_2(\text{CO}_3)_2\text{F}_x(\text{OH})_{1-x}$  ( $0 < x \leq 1$ ): A new member of alkali-lead carbonate fluoride system with large birefringence, *J. Solid State Chem.*, 2020, **288**, 121407.
- 12 T. T. Tran and P. S. Halasyamani, New fluoride carbonates: centrosymmetric  $\text{KPb}_2(\text{CO}_3)_2\text{F}$  and noncentrosymmetric  $\text{K}_{2.70}\text{Pb}_{5.15}(\text{CO}_3)_5\text{F}_3$ , *Inorg. Chem.*, 2013, **52**, 2466-2473.
- 13 G. H. Zou, L. Huang, N. Ye, C. S. Lin, W. D. Cheng and H. Huang,  $\text{CsPbCO}_3\text{F}$ : a strong second-harmonic generation material derived from enhancement via p-pi interaction, *J. Am. Chem. Soc.*, 2013, **135**, 18560-18566.
- 14 E. N. Rao, G. Vaitheeswaran, A. H. Reshak and S. Auluck, Role of spin-orbit interaction on the nonlinear optical response of  $\text{CsPbCO}_3\text{F}$  using DFT, *Phys. Chem. Chem. Phys.*, 2017, **19**, 31255-31266.
- 15 T. T. Tran, J. G. He, J. M. Rondinelli and P. S. Halasyamani,  $\text{RbMgCO}_3\text{F}$ : a new beryllium-free deep-ultraviolet nonlinear optical material, *J. Am. Chem. Soc.*, 2015, **137**, 10504-10507.
- 16 G. S. Yang, G. Peng, N. Ye, J. Y. Wang, M. Luo, T. Yan and Y. Q. Zhou, Structural modulation of anionic group architectures by cations to optimize SHG effects: a facile route to new NLO materials in the  $\text{ATCO}_3\text{F}$  (A = K, Rb; T = Zn, Cd) series, *Chem. Mater.*, 2015, **27**, 7520-7530.
- 17 L. L. Liu, Y. Yang, X. Y. Dong, B. B. Zhang, Y. Wang, Z. H. Yang and S. L. Pan, Design and syntheses of three novel carbonate halides:  $\text{Cs}_3\text{Pb}_2(\text{CO}_3)_3\text{I}$ ,  $\text{KBa}_2(\text{CO}_3)_2\text{F}$ , and  $\text{RbBa}_2(\text{CO}_3)_2\text{F}$ , *Chem. Eur. J.*, 2016, **22**, 2944-2954.
- 18 L. L. Cao, G. Peng, T. Yan, M. Luo, C. S. Lin and N. Ye, Three alkaline-rare earth cations carbonates with

- large birefringence in the deep UV range, *J. Alloys Compd.*, 2018, **742**, 587-593.
- 19 X. H. Meng, P. F. Gong, C. L. Tang, W. L. Yin, Z. S. Lin and M. J. Xia, From centrosymmetry to noncentrosymmetry: tailoring the structural arrangements of carbonates with strong nonlinear optical response through partial anion substitution, *Adv. Opt. Mater.*, 2021, **9**, 2100594.
- 20 G. Peng, Y. H. Tang, C. S. Lin, D. Zhao, M. Luo, T. Yan, Y. Chen and N. Ye, Exploration of new UV nonlinear optical materials in the sodium-zinc fluoride carbonate system with the discovery of a new regulation mechanism for the arrangement of  $[\text{CO}_3]^{2-}$  groups, *J. Mater. Chem. C.*, 2018, **6**, 6526-6533.
- 21 G. Peng, C. S. Lin and N. Ye,  $\text{NaZnCO}_3(\text{OH})$ : a high-performance carbonate ultraviolet nonlinear optical crystal derived from  $\text{KBe}_2\text{BO}_3\text{F}_2$ , *J. Am. Chem. Soc.*, 2020, **142**, 20542-20546.
- 22 H. X. Tang, Q. R. Shui, R. B. Fu, Z. Q. Zhou, W. X. Bao, Z. J. Ma and X. T. Wu,  $\text{Zn}(\text{NH}_3)\text{CO}_3$ : a "three-in-one" UV nonlinear optical crystal built by a polar molecule bonding strategy, *J. Mater. Chem. C.*, 2021, **9**, 16477-16484.
- 23 X. M. Liu, L. Kang, P. F. Gong and Z. S. Lin,  $\text{LiZn}(\text{OH})\text{CO}_3$ : a deep-ultraviolet nonlinear optical hydroxycarbonate designed from a diamond-like structure, *Angew. Chem. Int. Ed.*, 2021, **60**, 13574-13578.
- 24 C. C. Tang, X. X. Jiang, S. Guo, M. J. Xia, L. J. Liu, X. Y. Wang, Z. S. Lin and C. T. Chen, Synthesis, crystal structure and optical properties of a new fluorocarbonate with an interesting sandwich-like structure, *Dalton Trans.*, 2018, **47**, 6464-6469.
- 25 J. K. Wang, Y. S. Cheng, H. P. Wu, Z. G. Hu, J. Y. Wang, Y. C. Wu and H. W. Yu,  $\text{Sr}_3[\text{SnOSe}_3][\text{CO}_3]$ : a heteroanionic nonlinear optical material containing planar pi-conjugated  $[\text{CO}_3]$  and heteroleptic  $[\text{SnOSe}_3]$  anionic groups, *Angew. Chem. Int. Ed.*, 2022, **61**, e202201616.
- 26 W. B. Cai, J. Q. Chen, S. L. Pan and Z. H. Yang, Enhancement of band gap and birefringence induced via pi-conjugated chromophore with "tail effect", *Inorg. Chem. Front.*, 2022, **9**, 1224-1232.
- 27 Q. Wang, W. Song, Y. Lan, L. L. Cao, L. Huang, D. J. Gao, J. Bi and G. H. Zou,  $\text{KLi}_2\text{CO}_3\text{F}$ : a beryllium-free KBBF-type deep-UV carbonate with an enhanced interlayer interaction and large birefringence, *Inorg. Chem. Front.*, 2022, DOI: 10.1039/d2qi00625a.
